# Supplementary material for: Photodegradation of spent wash, a sugar industry waste, using vanadium-doped TiO2 nanoparticles
Source: Royal Society of Chemistry journal article supplement (doi:10.1039/c8ra02869a), 2018-01-01
Supplement: c8ra02869a1.pdf [file c8ra02869a1.pdf]

## **Photo-degradation of spentwash, a sugar industry waste using Vanadium doped TiO<sub>2</sub> nanoparticles.**

Shrikant. P.Takle<sup>a</sup>, Sonali D. Naik<sup>a</sup>, Supriya. K. Khore<sup>a</sup>, Siddhanath A. Ohwal<sup>a</sup>, Namdev. M. Bhujbal<sup>b</sup>,  
Sukeshani. L. Landge<sup>b</sup>, Bharat B. Kale<sup>a</sup>, and Ravindra S. Sonawane<sup>a\*</sup>

<sup>a</sup> Centre for Materials for Electronic Technology, Government of India, Panchawati, off  
Pashan Road, Pune 411008, India

<sup>b</sup> Annasaheb Magar College, Hadapsar, Pune 411028, India.

**Corresponding Author:**sonawaner@yahoo.com, sonawane@cmet.gov.in

### **Electronic Supplementary Information**

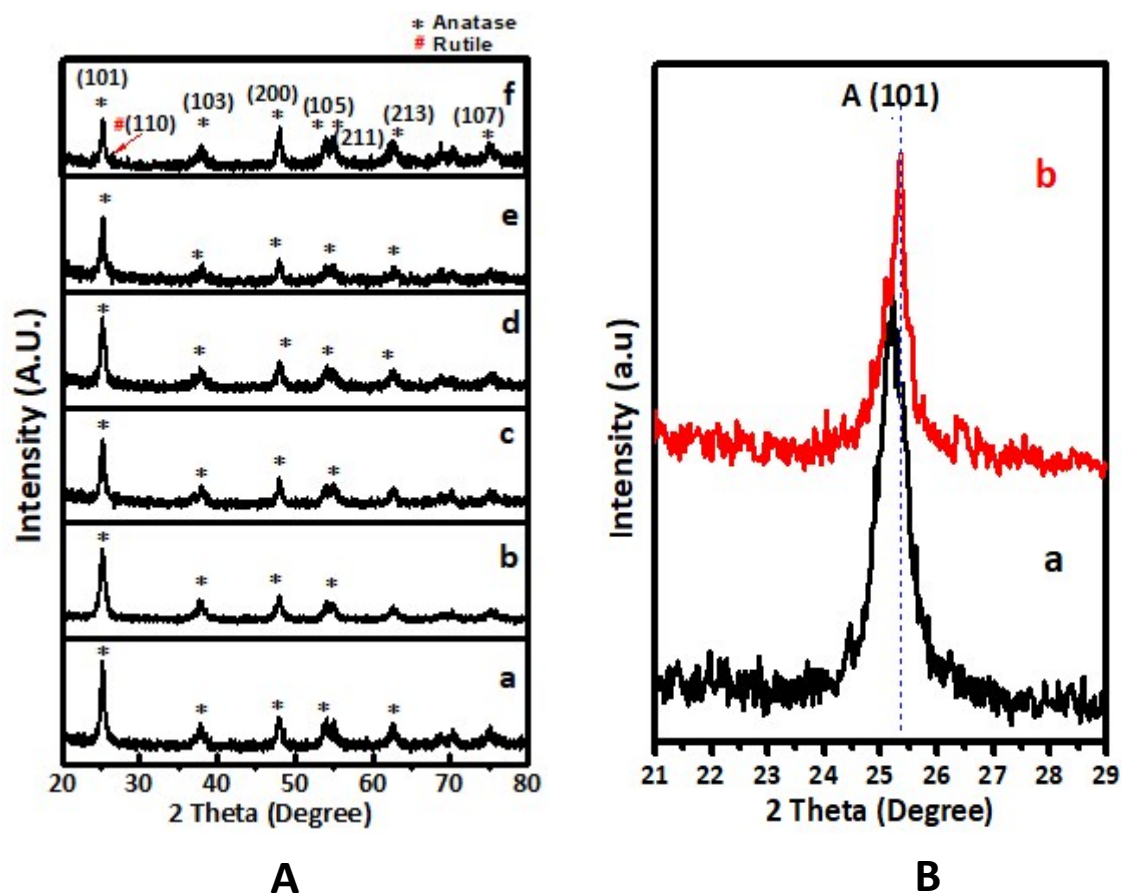

Fig. S1 (A) XRD pattern of (a) TiO<sub>2</sub> (b) 1% V-TiO<sub>2</sub> (c) 2% V-TiO<sub>2</sub> (d) 3% V-TiO<sub>2</sub>, (e) 4% V-TiO<sub>2</sub> and (f) 5% V-TiO<sub>2</sub> samples obtained by Calcination at 400°C. and (B) Enlarged version XRD pattern of (101) plane (a) TiO<sub>2</sub> and (b) 1% V-TiO<sub>2</sub>

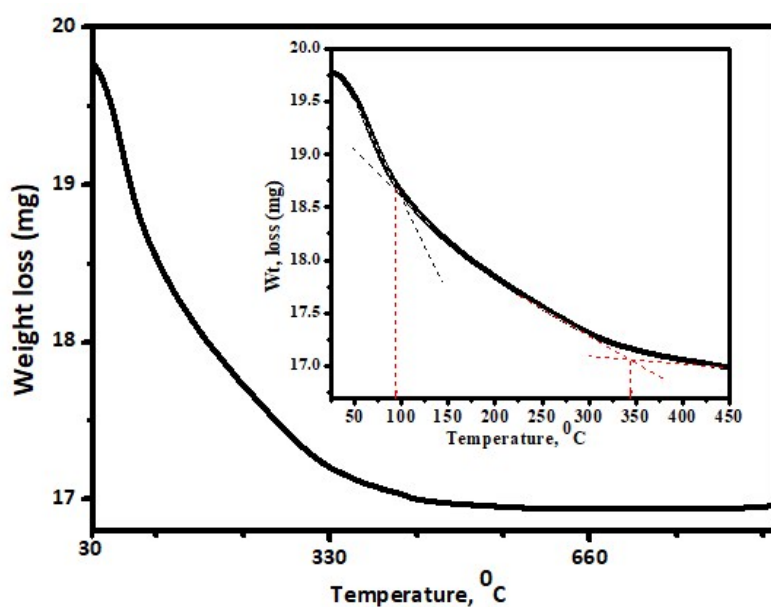

Fig. S2 Thermo-gravimetric analysis of 1% V-TiO<sub>2</sub> powdered gel sample.

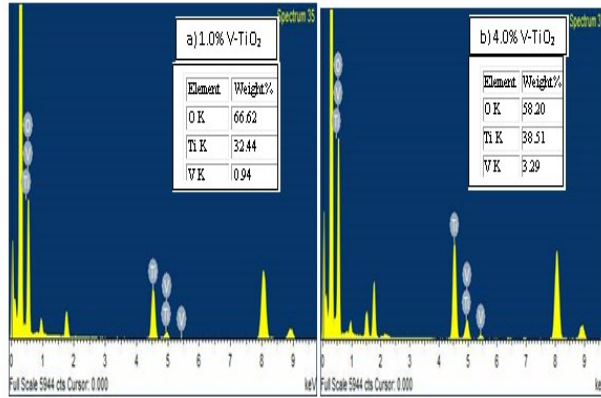

Fig. S3 EDX spectrum and data of (a) 1% V- TiO<sub>2</sub> and (b) 4% V- TiO<sub>2</sub>

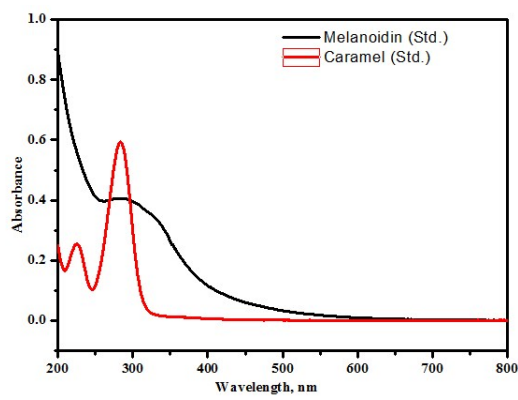

Fig. S4 UV-Visible absorption spectra of standard Caramel & Melanoidin sample.

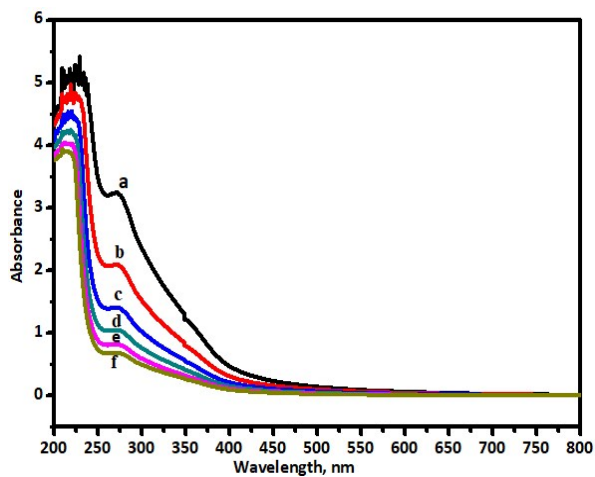

Fig. S5 UV-Visible spectra of Spent wash solution after irradiation with sunlight for (a) 0 h, (b) 1 h, (c) 2 h, (d) 3 h, (e) 4 h and (f) 5 h in presence of 1 % V-TiO<sub>2</sub> catalyst

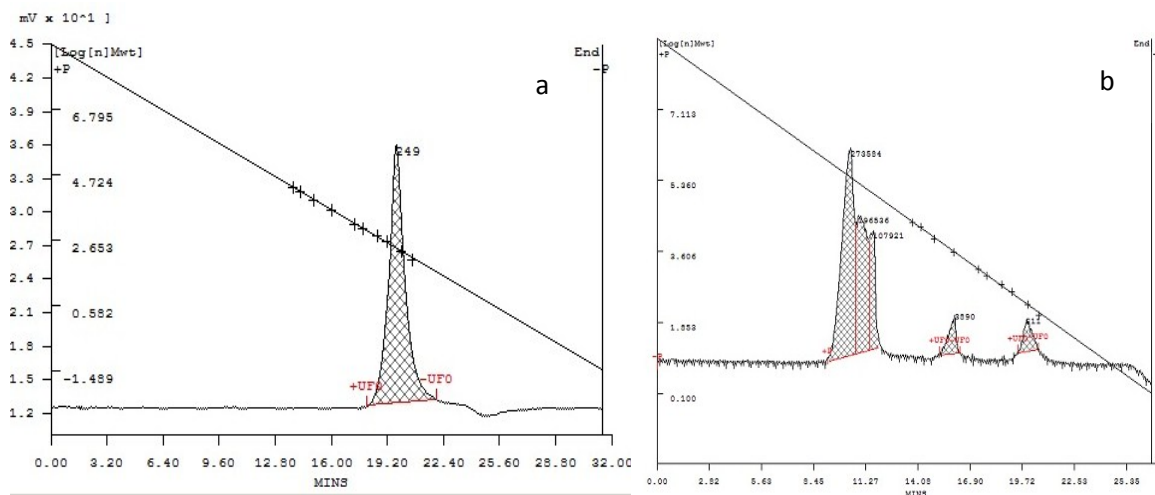

Fig. S6 GPC Chromatogram of standard (a) Caramel and standard (b) Melanoidin sample

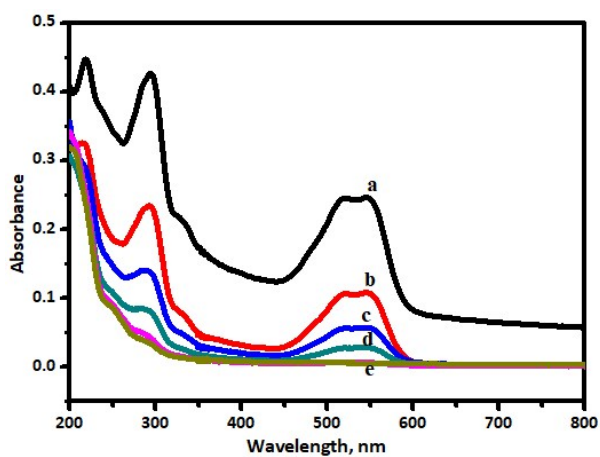

Fig.S7. UV-Vis spectra of Jakofix Red Dye (HE 8BN) solution after irradiation with sunlight for 0 h, (b) 1 h,(c) 2 h, (d) 3 h, (e) 3.5 h in presence of 1% V-TiO<sub>2</sub> catalyst.

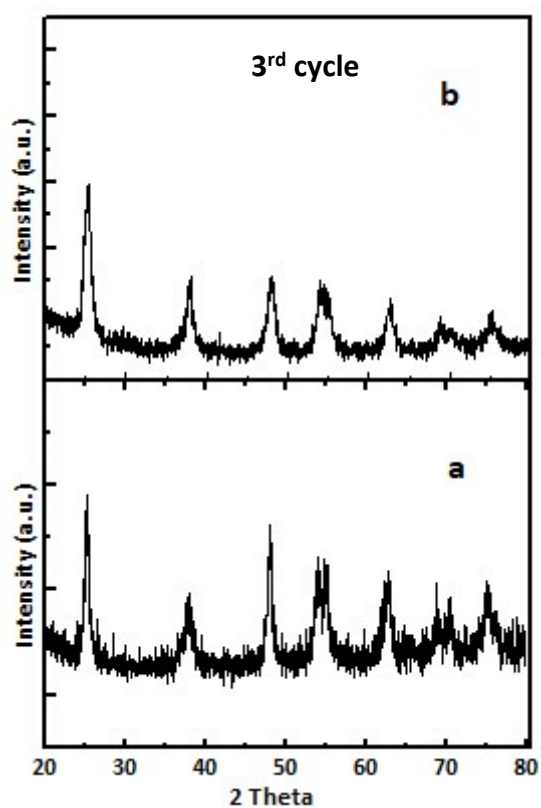

Fig. S8 XRD pattern of (a) 1% V-TiO<sub>2</sub> calcined at 400°C and (b) 1% V-TiO<sub>2</sub> recovered after 3<sup>rd</sup> cycles of photo-degradation of spent wash under sunlight

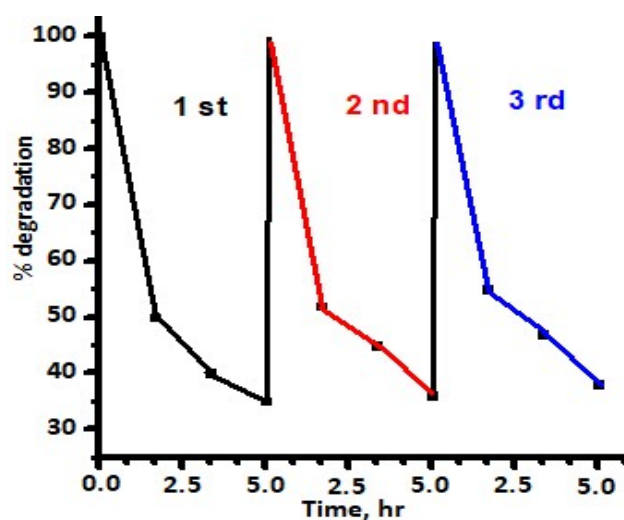

Fig. S9. Degradation of spent wash using 1%V-TiO<sub>2</sub> catalyst under natural sunlight for 3 consecutive cycles.

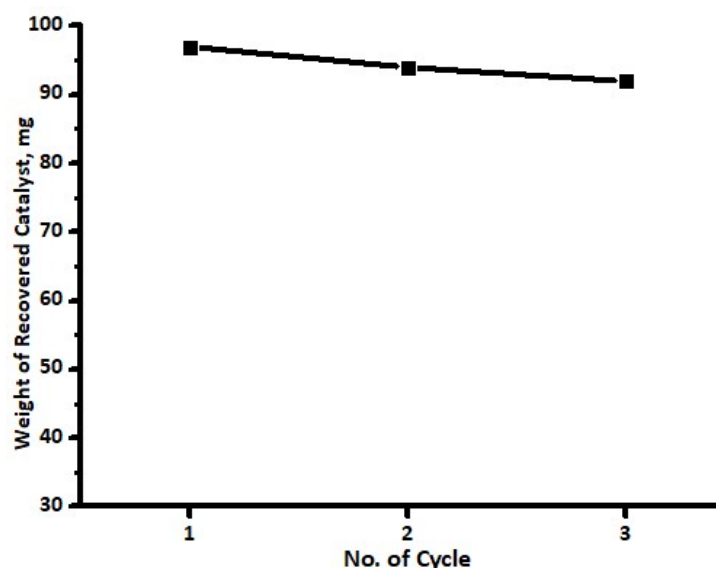

Fig. S10 Recovery of 1% V-TiO<sub>2</sub> catalyst with respect to number of cycle.
